# Supplementary material for: Peg-Grafted Liposomes for L-Asparaginase Encapsulation
Source: MDPI journal article supplement (doi:10.3390/pharmaceutics14091819), 2022-08-29
Supplement: s1 [file s1]

## Supplementary Files

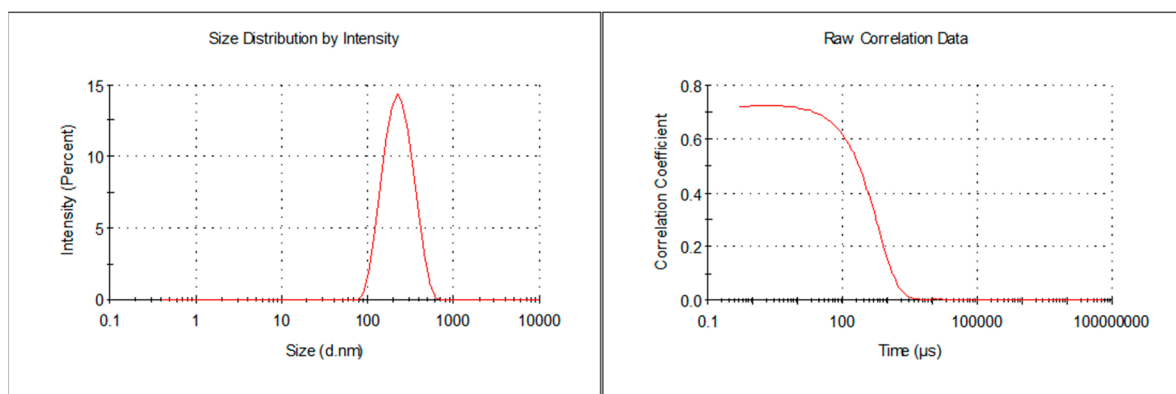

**Figure S1.** Dynamic Light Scattering graphs. Size distribution by intensity and Raw correlation data of DOPC formulations.

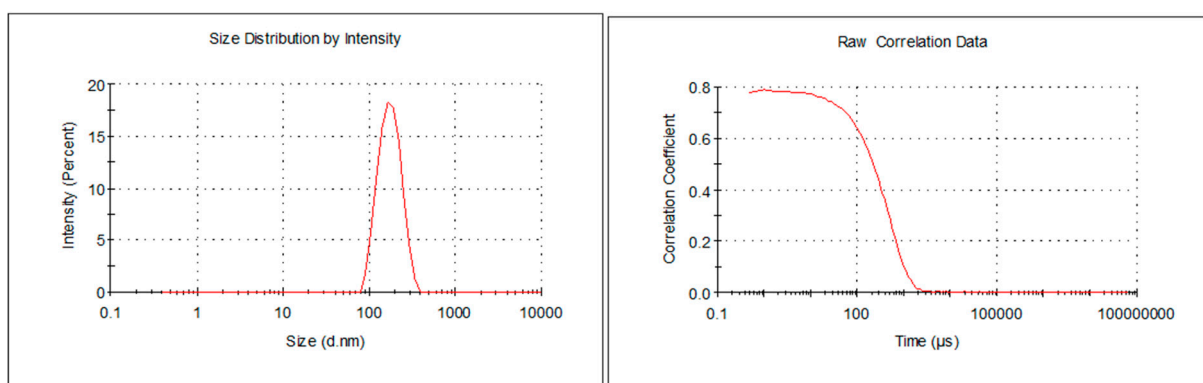

**Figure S2.** Dynamic Light Scattering graphs. Size distribution by intensity and Raw correlation data of DOPC/DSPE-PEG 5% formulations.

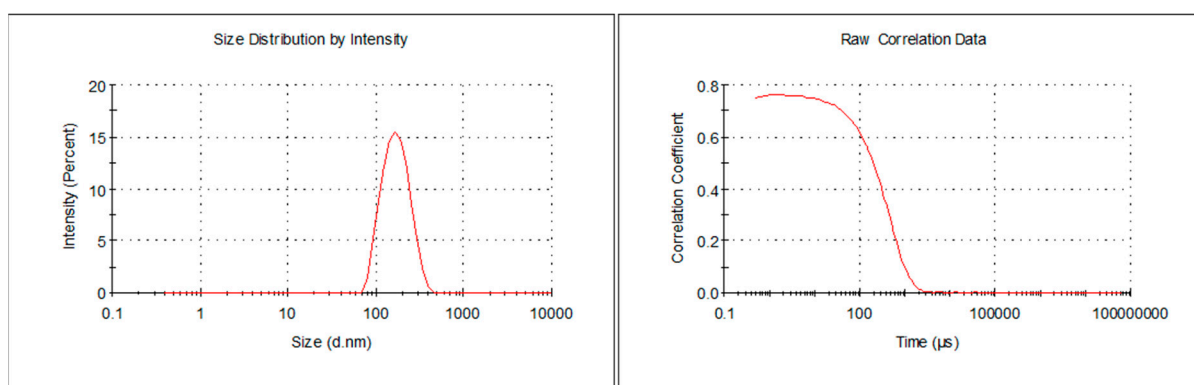

**Figure S3.** Dynamic Light Scattering graphs. Size distribution by intensity and Raw correlation data of DOPC/DSPE-PEG 10% formulations.

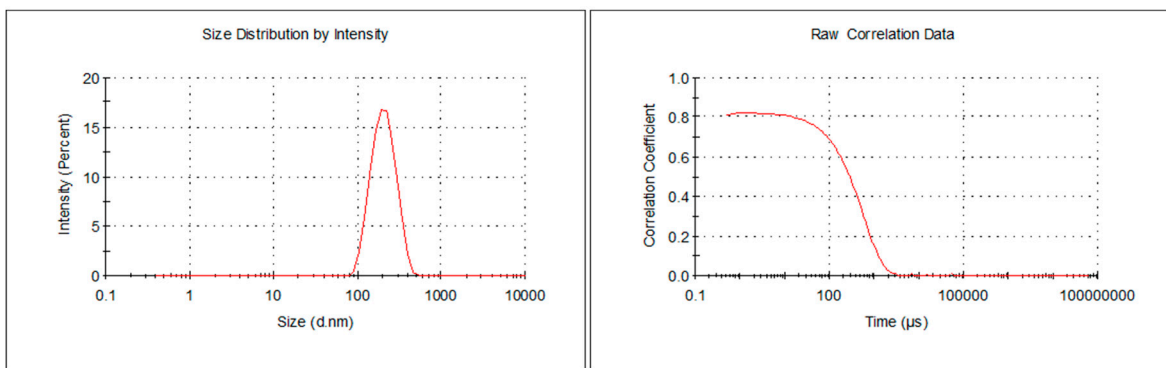

**Figure S4.** Dynamic Light Scattering graphs. Size distribution by intensity and Raw correlation data of DMPC formulations.

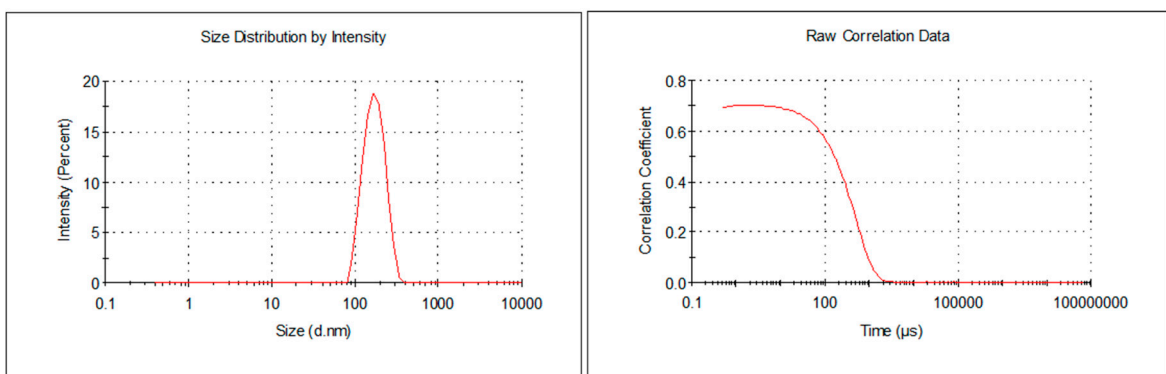

**Figure S5.** Dynamic Light Scattering graphs. Size distribution by intensity and Raw correlation data of DMPC/DSPE-PEG 5% formulations.

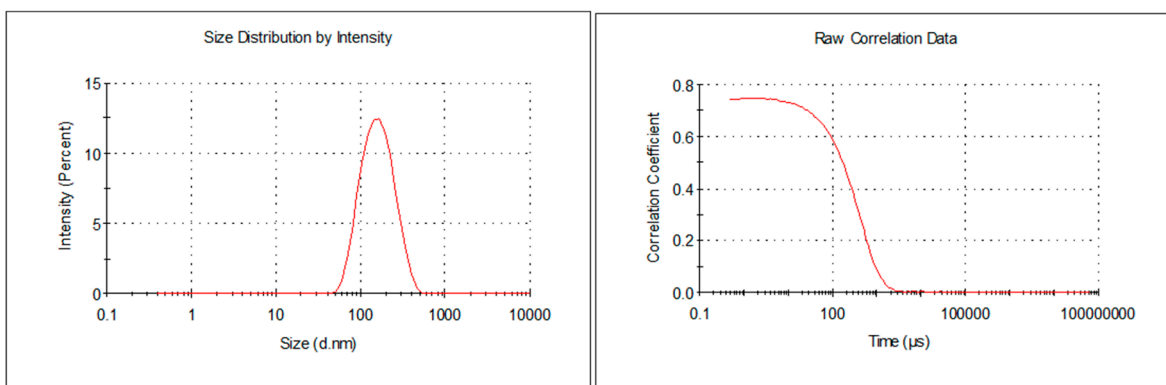

**Figure S6.** Dynamic Light Scattering graphs. Size distribution by intensity and Raw correlation data of DMPC/DSPE-PEG 10% formulations.

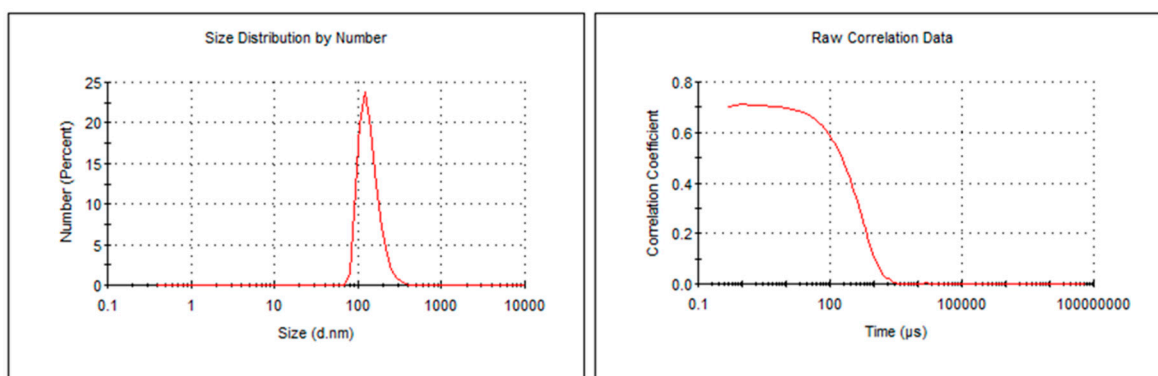

**Figure S7.** Dynamic Light Scattering graphs. Size distribution by number and Raw correlation data of ASNase-DOPC.

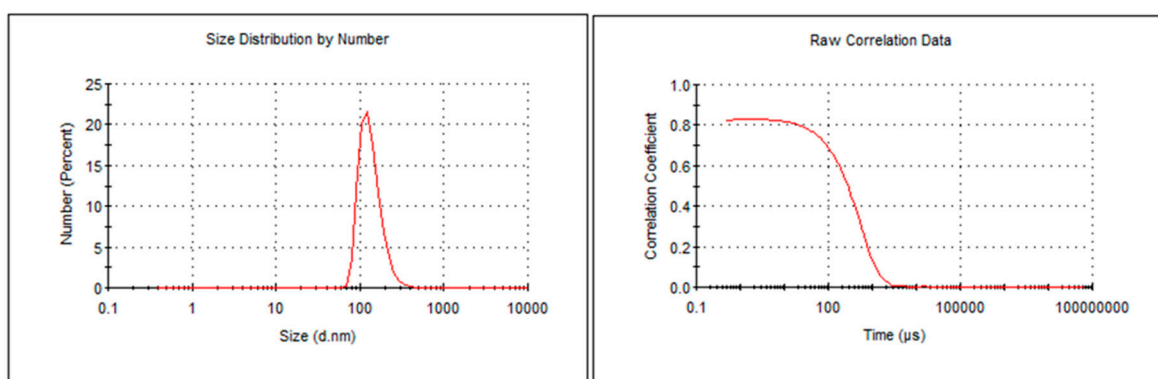

**Figure S8.** Dynamic Light Scattering graphs. Size distribution by number and Raw correlation data of ASNase-DOPC/DSPE-PEG 5%.

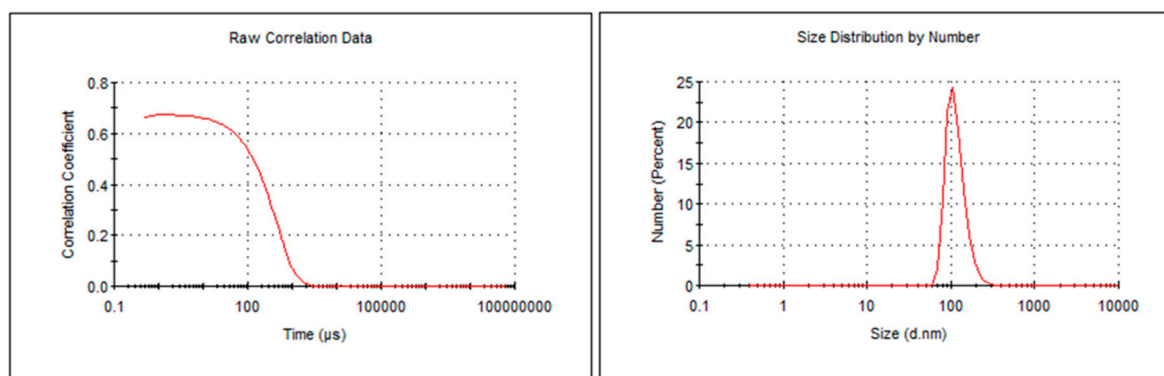

**Figure S9.** Dynamic Light Scattering graphs. Size distribution by number and Raw correlation data of ASNase-DOPC/DSPE-PEG 10%.

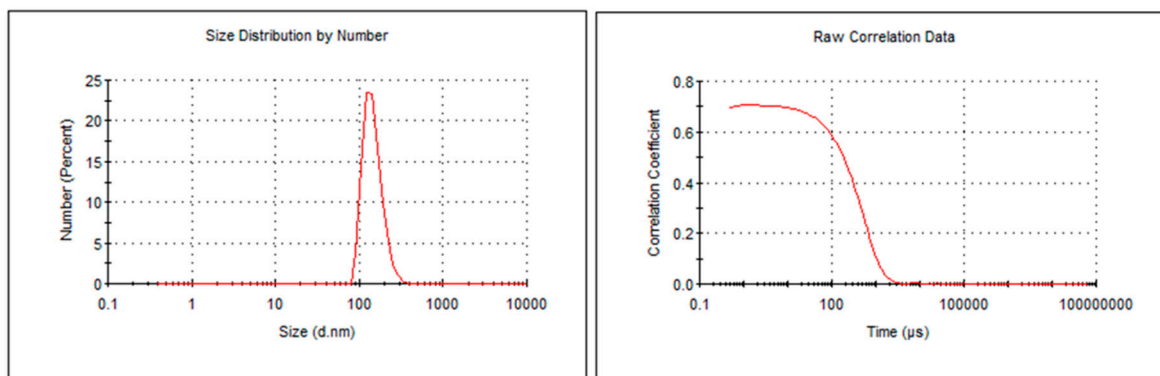

**Figure S10.** Dynamic Light Scattering graphs. Size distribution by number and Raw correlation data of ASNase-DMPC.

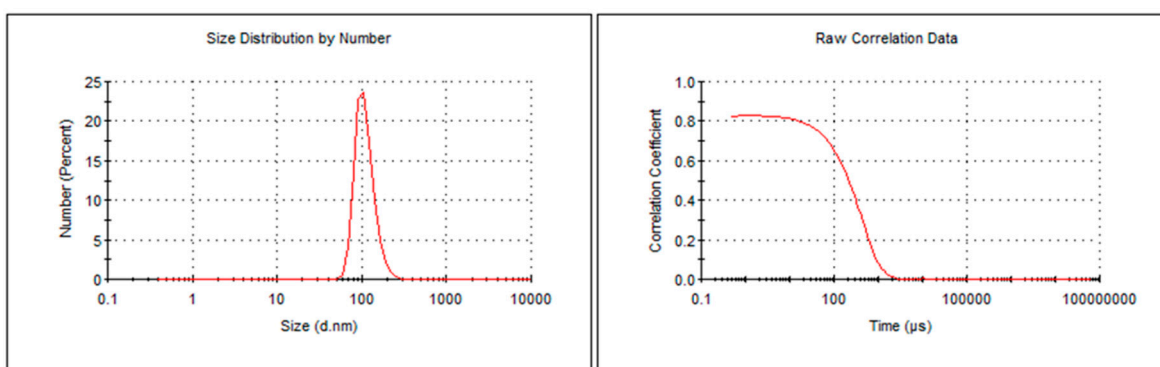

**Figure S11.** Dynamic Light Scattering graphs. Size distribution by number and Raw correlation data of ASNase-DMPC/DSPE-PEG 5%.

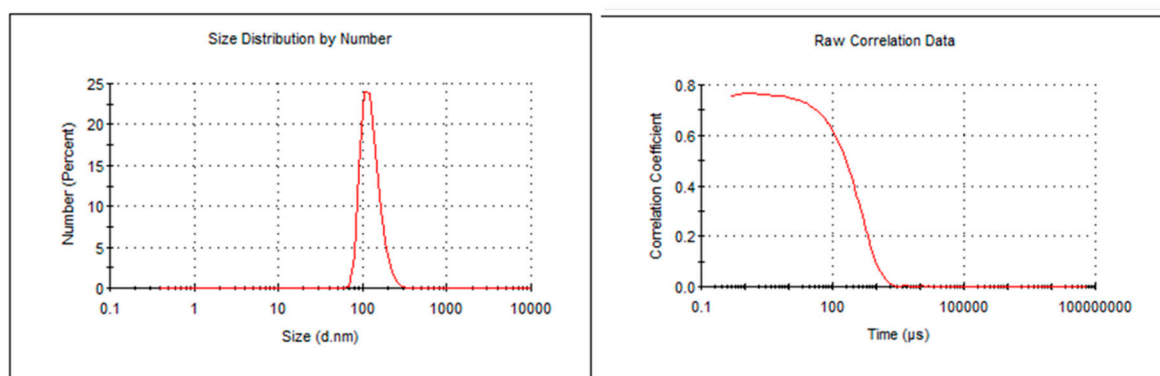

**Figure S12.** Dynamic Light Scattering graphs. Size distribution by number and Raw correlation data of ASNase-DMPC/DSPE-PEG 10%.
